# Supplementary material for: Astroglial CB1 Cannabinoid Receptors Mediate CP 55,940-Induced Conditioned Place Aversion Through Cyclooxygenase-2 Signaling in Mice
Source: Front Cell Neurosci. 2021 Nov 23;15:772549. doi: 10.3389/fncel.2021.772549 (PMC8650095; doi:10.3389/fncel.2021.772549)
Supplement: Supplementary file 3 [file Table_1.XLSX]

## Sheet: Figure 1B
	individual data points			statistics					individual data points			statistics
Vehicle	pre-test	post-test			pre-test	post-test		CP 55,940	pre-test	post-test			pre-test	post-test
n1	347.707	411.16		Mean±SEM	341 + 18.77	363.1 + 38.87		n1	287	174.28		Mean±SEM	310.0 + 12.58	206.3 + 29.32
n2	236.84	182		test	Brown-Forsythe and Welch's ANOVA test			n2	247.12	24.04		test	Brown-Forsythe and Welch's ANOVA test
n3	286.733	311.6		Treatment effect	t = 0.5127; df = 10.1			n3	361.84	146.96		Treatment effect	t = 3.250; df =12.21
n4	364.187	357.64		P value	0.855			n4	281.92	169.96		P value	0.0136
n5	381.107	413.36		Significance	P > 0.05			n5	292.4	176.2		Significance	P < 0.05
n6	396.72	314.52						n6	358.32	370.28
n7	349.307	567.28						n7	329.49	278.33
n8	365.027	347.12						n8	292.8	273.13
								n9	360.267	233.8
								n10	288.933	215.93

## Sheet: Figure 2A
	individual data points			statistics					individual data points			statistics				individual data points			statistics				individual data points			statistics				individual data points			statistics
Vehicle	pre-test	post-test			pre-test	post-test		CP 55,940	pre-test	post-test			pre-test	post-test	CP 55,940+SR141716A+SR144528	pre-test	post-test			pre-test	post-test	CP 55,940+SR141716A	pre-test	post-test			pre-test	post-test	CP 55,940+SR144528	pre-test	post-test			pre-test	post-test
n1	358.747	346.32		Mean±SEM	335.8 + 18.91	364.4 + 25.61		n1	293.307	164.12		Mean±SEM	320.6 + 11.13	194.0 + 17.23	n1	239.02	281		Mean±SEM	272.3 + 12.19	295.4 + 18.33	n1	354.62	381.13		Mean±SEM	315.4 + 10.80	285.4 + 25.50	n1	338.347	336.56		Mean±SEM	324.6 + 15.20	237.8 + 24.12
n2	371.733	422.48		test	Brown-Forsythe and Welch's ANOVA test			n2	353.56	212.6		test	Brown-Forsythe and Welch's ANOVA test		n2	254.42	266.73		test	Brown-Forsythe and Welch's ANOVA test		n2	309.91	255.53		test	Brown-Forsythe and Welch's ANOVA test		n2	382.56	205.8		test	Brown-Forsythe and Welch's ANOVA test
n3	401.947	375.08		Treatment effect	t = 0.8984; df = 11.04			n3	347.907	258.48		Treatment effect	t =6.176; df = 11.98		n3	280.96	261.67		Treatment effect	t = 1.047; df = 8.700		n3	344.663	384.93		Treatment effect	t = 1.085; df =12.13		n3	322.227	123.68		Treatment effect	t = 3.045; df = 11.80
n4	275.093	233.6		P value	0.7709			n4	310.333	245		P value	0.0001		n4	250.56	381.53		P value	0.69		n4	267.133	170.53		P value	0.2989		n4	287.24	206.28		P value	0.0104
n5	269.893	430.16		Significance	P > 0.05			n5	313.4	125.44		Significance	P < 0.001		n5	290.22	305.73		Significance	P > 0.05		n5	316.447	305.93		Significance	P > 0.05		n5	254.36	265.96		Significance	P < 0.05
n6	316.48	404.64						n6	278.907	138.04					n6	318.82	275.67					n6	269.843	171.6					n6	378.64	274.28
n7	356.36	338.2						n7	301.227	221.12												n7	348.157	363.87					n7	314.333	297.76
								n8	366.267	186.88												n8	285.333	225.07					n8	319.453	192.32
																						n9	354.733	328.4
																						n10	303.243	266.53

## Sheet: Figure 2B
	individual data points			statistics					individual data points			statistics				individual data points			statistics
SR141716A	pre-test	post-test			pre-test	post-test		SR144528	pre-test	post-test			pre-test	post-test	SR141716A+SR144528	pre-test	post-test			pre-test	post-test
n1	240.22	335.8		Mean±SEM	251.5 + 11.52	293.6 + 21,95		n1	330.893	331.68		Mean±SEM	315.3 + 12.16	328.6 +16.86	n1	278.69	352		Mean±SEM	257.4 + 10.67	293.5 +18.04
n2	213.513	336.47		test	Brown-Forsythe and Welch's ANOVA test			n2	319.08	292.32		test	Brown-Forsythe and Welch's ANOVA test		n2	244.223	276.2		test	Brown-Forsythe and Welch's ANOVA test
n3	209.757	353.8		Treatment effect	t =1.697; df = 15.12			n3	344.4	365.96		Treatment effect	t = 0.6399; df = 16.36		n3	295.733	257.33		Treatment effect	t = 1.723; df = 8.117
n4	191.623	198.87		P value	0.2954			n4	256.373	335.44		P value	0.8969		n4	261.357	237.2		P value	0.3245
n5	278.18	263.6		Significance	P > 0.05			n5	358.84	373.28		Significance	P > 0.05		n5	236.087	330.2		Significance	P > 0.05
n6	238.353	297.53						n6	283.787	375.48					n6	228.267	308.13
n7	308.11	250.87						n7	370.653	360.56
n8	287.177	377.93						n8	277.487	247.8
n9	257.89	154.13						n9	281.557	232.2
n10	298.823	379.2						n10	329.49	370.87
n11	243.313	281.53

## Sheet: Figure 2C
	individual data points			statistics					individual data points			statistics				individual data points			statistics				individual data points			statistics
Cnr1+/+ Vehicle	pre-test	post-test			pre-test	post-test		Cnr1-/- Vehicle	pre-test	post-test			pre-test	post-test	Cnr1+/+ CP	pre-test	post-test			pre-test	post-test	Cnr1-/- CP	pre-test	post-test			pre-test	post-test
n1	261.24	271.36		Mean±SEM	273.4 + 23.92	296.3 + 29.12		n1	207.413	141		Mean±SEM	268.1 + 14.55	225.1 + 27.66	n1	284.643	212.2		Mean±SEM	278.0 + 7.765	160.2 + 22.03	n1	266.28	247.8		Mean±SEM	226.6 + 23.29	232.1 + 40.27
n2	330.8	248.24		test	Brown-Forsythe and Welch's ANOVA test			n2	299.093	281.72		test	Brown-Forsythe and Welch's ANOVA test		n2	260.687	247.67		test	Brown-Forsythe and Welch's ANOVA test		n2	131.133	33.16		test	Brown-Forsythe and Welch's ANOVA test
n3	186.36	201.28		Treatment effect	t =0.6071; df = 19.27			n3	197.987	82.84		Treatment effect	t =1.374; df = 13.63		n3	295.957	191.67		Treatment effect	t =5.044; df = 8.712		n3	76.0667	36.36		Treatment effect	t =0.1166; df = 14.41
n4	353.747	282.96		P value	0.7983			n4	259.107	171.64		P value	0.3465		n4	293.357	80		P value	0.0015		n4	239.173	191.44		P value	0.9917
n5	105.493	124.72		Significance	P > 0.05			n5	339.753	353.67		Significance	P > 0.05		n5	266.623	117.33		Significance	P < 0.01		n5	217.36	326.16		Significance	P > 0.05
n6	332.827	347.52						n6	292.243	201.4					n6	292.29	147.8					n6	292.98	435.67
n7	286.427	357.44						n7	292.31	262.33					n7	235.157	84.2					n7	240.22	350.67
n8	327.573	343.48						n8	282.887	192.47					n8	295.463	200.67					n8	305.443	199
n9	283.827	387.92						n9	290.777	350.87												n9	207.557	244.93
n10	341.947	468.56						n10	219.22	213.33												n10	290.133	255.4
n11	196.987	225.4

## Sheet: Figure 2D
	individual data points			statistics
	Cnr1+/+	Cnr1-/-			Cnr1+/+	Cnr1-/-
n1	7706.57	7639.3		Mean±SEM	5141 + 352.4	4893 + 636.9
n2	8266.26	9523.34		test	t-test
n3	4581.38	4019.86		Treatment effect	t=0.3080, df=43
n4	3952.08	4137.76		P value	0.7596
n5	6163.66	9275.63		Significance	P > 0.05
n6	4044.6	1965.87
n7	5296.25	1314.87
n8	3753.98	4252.54
n9	4285.83	6066.92
n10	4726.7	3809.41
n11	4123.69	14485.1
n12	4401.96	3921.62
n13	8605.87	8130
n14	4493.39	9256.69
n15	4223.53	1164.6
n16	6162.07	3948.33
n17	3622.57	1133.56
n18	5185.04	1642.35
n19	4092.6	2025.53
n20		3653.28
n21		3630.97
n22		2902.07
n23		4104.06
n24		5052.91
n25		2660.98
n26		7512.87

## Sheet: Figure 4B
	individual data points			statistics					individual data points			statistics
Cnr1GFP-flox/GFP-flox	pre-test	post-test			pre-test	post-test		Cnr1GFP-flox/GFP-flox:Aldh1l1-CreERT2	pre-test	post-test			pre-test	post-test
n1	287.87	128.8		Mean±SEM	233.8 + 17.95	210.9 + 23.60		n1	109.07	158.6		Mean±SEM	237.6 + 27.58	129.4 + 26.45
n2	153	137.33		test	Brown-Forsythe and Welch's ANOVA test			n2	124.87	22.73		test	Brown-Forsythe and Welch's ANOVA test
n3	176.2	335.67		Treatment effect	t =0.7736; df = 29.87			n3	162.07	107.07		Treatment effect	t =2.832; df = 21.96
n4	128.67	414		P value	0.6922			n4	197.67	119.87		P value	0.0194
n5	331.2	162.27		Significance	P > 0.05			n5	363.456	306.1		Significance	P < 0.05
n6	308.279	317.444						n6	376.318	94.5926
n7	366.697	164.561						n7	305.392	292.787
n8	225.791	284.145						n8	133.243	117.87
n9	320.67	294.93						n9	345.58	58.93
n10	184.777	188.8						n10	217.353	173.6
n11	321.023	73.8						n11	243.553	30.27
n12	209.31	155.27						n12	272.557	70.33
n13	183.357	169.67
n14	148.577	142.53
n15	205.423	142.2
n16	237.847	335.33
n17	185.933	137.87

## Sheet: Figure 4C
		individual data points			statistics
	Cnr1+/+	Cnr1GFP-flox/GFP-flox	Cnr1GFP-flox/GFP-flox :Aldh1l1-CreERT2			Cnr1+/+	Cnr1GFP-flox/GFP-flox
n1	1812.14	2784.13	2506.52		Mean±SEM	3419 + 541.8	2591 + 296.0
n2	2319.02	1327.59	2612.67		test	t-test
n3	2223.13	2690.49	3319.62		Treatment effect	t=1.450, df=21
n4	3031.8	4415.85	2997.67		P value	0.1619
n5	4841.65	2283.54	2235.06		Significance	P > 0.05
n6	4215.43	1955.11	2432.84
n7	5492.06	3134.56	1288.01			Cnr1+/+	Cnr1GFP-flox/GFP-flox :Aldh1l1-CreERT2
n8		4798.39	4211.12		Mean±SEM	3419 + 541.8	2746 + 269.6
n9		1256.25	3114.85		test	t-test
n10		1728.71			Treatment effect	t=1.192, df=14
n11		1561.87			P value	0.2531
n12		4141.42			Significance	P > 0.05
n13		1527.32
n14		2470.14				Cnr1GFP-flox/GFP-flox	Cnr1GFP-flox/GFP-flox :Aldh1l1-CreERT2
n15		3964.35			Mean±SEM	2591 + 296.0	2746 + 269.6
n16		1422.24			test	t-test
					Treatment effect	t=0.3484, df=23
					P value	0.7307
					Significance	P > 0.05

## Sheet: Figure 5G
	individual data points			statistics
	Ctrl	CPA			Ctrl	CPA
n1	0.375763	2.05784		Mean±SEM	1.000 + 0.2548	3.103 + 0.6183
n2	1.62424	2.07852		test	t-test
n3	1	3.74534		Treatment effect	t=3.144, df=6
n4	1	4.5286		P value	0.02
				Significance	P < 0.05

## Sheet: Figure 6A
	individual data points			statistics					individual data points			statistics					individual data points			statistics					individual data points			statistics
Vehicle	pre-test	post-test			pre-test	post-test		CP 55,940	pre-test	post-test			pre-test	post-test		NS398+CP 55,940	pre-test	post-test			pre-test	post-test		NS398	pre-test	post-test			pre-test	post-test
n1	208.907	239.93		Mean±SEM	269.9 + 11.56	286.1 + 19.33		n1	275.71	111		Mean±SEM	276.2 + 11.20	209.7 + 22.38		n1	229.043	359.53		Mean±SEM	268.1 + 10.61	265.6 + 21.74		n1	242.31	247		Mean±SEM	246.4 + 14.79	267.5 + 18.48
n2	309.36	292.72		test	one-way ANOVA			n2	234.8	87.07		test	one-way ANOVA			n2	245.22	286.4		test	one-way ANOVA			n2	288.847	316.6		test	one-way ANOVA
n3	258.52	231.68		Treatment effect	t =0.7648; df = 72			n3	324.265	245.73		Treatment effect	t =2.743; df = 72			n3	240.623	192.73		Treatment effect	t =0.1029; df = 72			n3	289.177	299.67		Treatment effect	t =0.7261; df = 72
n4	285.787	211.72		P value	0.9064			n4	321.18	192.73		P value	0.0304			n4	288.823	142.53		P value	>0.9999			n4	189.11	264		P value	0.9212
n5	231.16	176.92		Significance	P > 0.05			n5	258.557	289.27		Significance	P < 0.05			n5	281.557	318.13		Significance	P > 0.05			n5	229.463	253		Significance	P > 0.05
n6	261.893	382.4						n6	316.4	205.87						n6	281.443	272.4						n6	211.8	314.27
n7	337.987	197						n7	223.643	232.47						n7	317.823	326.27						n7	274.177	177.67
n8	263.12	378.72						n8	282.843	199.67						n8	316.957	240.33
n9	307.547	364.56						n9	254.623	318						n9	234.8	311.6
n10	209.773	296.6						n10	270	215.07						n10	244.31	205.73
n11	257.69	339.96
n12	327.687	296.93
n13	248.977	310.73

## Sheet: Figure 6B
	individual data points			statistics					individual data points			statistics
CP 55,940+NS398	pre-test	post-test			pre-test	post-test		NS398	pre-test	post-test			pre-test	post-test
n1	307.8	434.67		Mean±SEM	187.3 + 41.73	201.7 + 49.93		n1	36.6233	187.07		Mean±SEM	162.9 + 51.48	223.5 + 56.31
n2	224	152.8		test	one-way ANOVA			n2	316.177	230.87		test	one-way ANOVA
n3	87.0433	267.33		Treatment effect	t =0.2276; df = 28			n3	63.3533	134.47		Treatment effect	t =0.7441; df = 28
n4	330.353	0		P value	0.9682			n4	322.957	378.93		P value	0.7116
n5	365.377	142.27		Significance	P > 0.05			n5	100.377	379.27		Significance	P > 0.05
n6	227.777	419.87						n6	138.09	30.13
n7	0	13.87
n8	111.113	43.73
n9	0	300.53
n10	219.823	241.6
